# Supplementary material for: Apical PAR complex proteins protect against programmed epithelial assaults to create a continuous and functional intestinal lumen
Source: eLife. 2021 Jun 17;10:e64437. doi: 10.7554/eLife.64437 (PMC8245128; doi:10.7554/eLife.64437)
Supplement: Figure 6—source data 1. — Number of larvae arrested at the L1 larval stage after 3 days, with three trials per indicated genotype. [file elife-64437-fig6-data1.xlsx]

## Sheet: Sheet1
	Description	Strain: genotype of larvae scored	Trial	L1 after 3 days	Older than L1
	E8 zif-1 (ifb-2p)	JLF204: ltSi569; zif-1(gk117); wowIs3	1	0	174
			2	2	196
			3	0	182
	E4 zif-1 (elt-2p)	JLF724: ltSi569 par-6(wow31)/tmC27[myo-2p::Venus]; wowIs28; zif-1(gk117); opIs310	1	3	227
			2	8	190
			3	7	213
	late zif-1 (asp-1p)	JLF1056: zif-1(gk117); wowEx175	1	2	52
			2	2	78
			3	1	77
	PAR-6::ZG	JLF212: par-6(wow31); zif-1(gk117)	1	3	185
			2	4	166
			3	1	168
	PAR-6::ZG11	JLF758: par-6(wow119); zif-1(gk117)	1	0	195
			2	1	183
			3	0	187
	ZG::PKC-3	JLF480: pkc-3(wow85); zif-1(gk117)	1	2	188
			2	1	206
			3	1	164
	ZY::CDC-42	JLF882: cdc-42(xn65); zif-1(gk117)	1	0	474
			2	0	541
			3	0	560
	PAR-6::ZG E8 gut(-)	JLF354: ltSi569 par-6(wow31); zif-1(gk117); wowIs3 from balancer(-) mothers	1	137	0
			2	109	2
			3	127	0
	PAR-6::ZG11 E8 gut(-)	JLF726: par-6(wow119); zif-1(gk117); wowIs3 from balancer(-) mothers	1	167	0
			2	107	0
			3	141	1
	PAR-6::ZG E4 gut(-)	JLF724: ltSi569 par-6(wow31); wowIs28; zif-1(gk117); opIs310 from balancer(-) mothers	1	137	0
			2	109	2
			3	127	0
	ZG::PKC-3 E8 gut(-)	JLF491: pkc-3(wow85); zif-1(gk117); wowIs3 from balancer(-) mothers	1	57	3
			2	85	3
			3	78	3
	ZY::CDC-42 E8 gut(-)	JLF883: ltSi569; cdc-42(xn65); zif-1(gk117); wowIs3 from balancer(-) mothers	1	66	111
			2	51	84
			3	64	86
	PAR-6::ZG late gut(-)	JLF1072: par-6(wow31); zif-1(gk117); wowEx175 from balancer(-) mothers	1	19	102
			2	15	73
			3	23	131
	PKC-3 E8gut(-), PKC-3(+) line 1	JLF866: pkc-3(wow85); zif-1(gk117); wowIs3; wowEx143[end-1p::BFP::PKC-3(+)] "line 1"	1	2	54
			2	7	55
			3	5	34
	PKC-3 E8gut(-), PKC-3(+) line 2	JLF867: pkc-3(wow85); zif-1(gk117); wowIs3; wowEx144[end-1p::BFP::PKC-3(+)] "line 2"	1	4	117
			2	3	104
			3	4	101
	PKC-3 E8gut(-), PKC-3(delPB) line 1	JLF870: pkc-3(wow85); zif-1(gk117); wowIs3; wowEx150[end-1p::BFP::PKC-3(ΔPB)] "line 1" from balancer(-) mothers	1	113	4
			2	97	3
			3	72	2
	PKC-3 E8gut(-), PKC-3(delPB) line 2	JLF1044: pkc-3(wow85); zif-1(gk117); wowIs3; wowEx148[end-1p::BFP::PKC-3(ΔPB)] "line 2" from balancer(-) mothers	1	52	2
			2	43	0
			3	54	0
	PKC-3 E8gut(-), PKC-3(G336N) line 1	JLF868: pkc-3(wow85); zif-1(gk117); wowIs3; wowEx146[end-1p::BFP::PKC-3(G336N)] "line 1" from balancer(-) mothers	1	50	50
			2	56	45
			3	50	43
	PKC-3 E8gut(-), PKC-3(G336N) line 2	JLF869: pkc-3(wow85); zif-1(gk117); wowIs3; wowEx147[end-1p::BFP::PKC-3(G336N)] "line 2" from balancer(-) mothers	1	37	55
			2	51	29
			3	55	44
	PKC-3 E8gut(-), PKC-3(K282A) line 1	JLF1074: pkc-3(wow85); zif-1(gk117); wowIs3; wowEx184[end-1p::BFP::PKC-3(K282A)] "line 1" from balancer(-) mothers	1	42	0
			2	32	0
			3	36	0
