# Supplementary material for: Apical PAR complex proteins protect against programmed epithelial assaults to create a continuous and functional intestinal lumen
Source: eLife. 2021 Jun 17;10:e64437. doi: 10.7554/eLife.64437 (PMC8245128; doi:10.7554/eLife.64437)
Supplement: Figure 6—source data 2. — Number of larvae with continuously filled lumen or with indicated luminal defect at the L1 larval stage after 3 hr incubation in blue-dyed food, with three trials per indicated genotype. [file elife-64437-fig6-data2.xlsx]

## Sheet: Sheet1
	Trial	Description	Strain: genotype of larvae scored	% filled*	% int1 obstruction	% later obstruction	% leaked into body	n
	1	control	JLF631: ltSi569; zif-1(gk117); wowIs3 zuIs70	1	0	0	0	28
	2			1	0	0	0	15
	3			0.952381	0	0.047619	0	21
Depletion	1	PAR-6gut(-)	JLF632: ltSi569 par-6(wow31); zif-1(gk117); wowIs3 zuIs70 from hT2(-) mothers	0.08	0.775	0.05	0.1	40
	2			0	0.7	0.1	0.2	10
	3			0	1	0	0	17
	1	PKC-3gut(-)	JLF876: ltSi569; pkc-3(wow85) zif-1(gk117); wowIs3 zuIs70 from mIn1(-) mothers	0.09	0.909091	0	0	22
	2			0.05	0.947368	0	0	19
	3			0	0.933333	0	0.07	15
	1	CDC-42gut(-)	JLF877: ltSi569; cdc-42(xn65) zif-1(gk117); wowIs3 zuIs70 from mIn1(-) mothers	0.42	0.323944	0.15493	0.1	71
	2			0.6	0.193548	0.177419	0.03	62
	3			0.46	0.180556	0.263889	0.1	72
	1	PAR-6gut(-); cdc-25.2(0)	JLF1020: ltSi569 par-6(wow31); zif-1(gk117); cdc-25.2(0); zuIs70; wowEx175 from hT2(-) oxTi980(+) mothers	0	0.8	0.2	0	20
	2			0	0.73	0.27	0	11
	3			0	0.71	0.29	0	14
	1	PAR-6 2-fold gut(-)	JLF1072: ltSi569 par-6(wow31); zif-1(gk117); zuIs70; wowEx175 from hT2(-) mothers	0.78	0	0.11	0.11	18
	2			0.76	0	0.2	0.04	46
	3			0.81	0	0.19	0	32
PKC-3 Rescue	1	PKC-3(+) line 1	JLF866: pkc-3(wow85); zif-1(gk117); wowIs3; wowEx143[end-1p::BFP::PKC-3(+)] "line 1"	1	0	0	0	24
	2			1	0	0	0	17
	3			0.894737	0.0526316	0	0.05	19
	1	PKC-3(+) line 2	JLF867: pkc-3(wow85); zif-1(gk117); wowIs3; wowEx144[end-1p::BFP::PKC-3(+)] "line 2"	0.863636	0	0.0909091	0.05	22
	2			0.938776	0	0.0408163	0.02	49
	3			0.928571	0.0238095	0.0238095	0.01	42
	1	PKC-3(delPB) line 1	JLF870: pkc-3(wow85); zif-1(gk117); wowIs3; wowEx150[end-1p::BFP::PKC-3(delPB)] "line 1" from mIn1(-) mothers	0.05	0.704545	0.25	0	44
	2			0	0.666667	0.333333	0	18
	3			0	0.545455	0.454545	0	22
	1	PKC-3(delPB) line 2	JLF1044: pkc-3(wow85); zif-1(gk117); wowIs3; wowEx148[end-1p::BFP::PKC-3(delPB)] "line 2" from mIn1(-) mothers	0	0.68	0.27	0.05	22
	2			0	0.67	0.21	0.12	33
	3			0	0.73	0.18	0.09	22
	1	PKC-3(G336N) line 1	JLF868: pkc-3(wow85); zif-1(gk117); wowIs3; wowEx146[end-1p::BFP::PKC-3(G336N)] "line 1" from mIn1(-) mothers	0.57	0.238095	0.166667	0.02	42
	2			0.54	0.2	0.257143	0	35
	3			0.43	0.233333	0.333333	0	30
	1	PKC-3(G336N) line 2	JLF869: pkc-3(wow85); zif-1(gk117); wowIs3; wowEx147[end-1p::BFP::PKC-3(G336N)] "line 2" from mIn1(-) mothers	0.21	0.307692	0.410256	0.08	39
	2			0.43	0.178571	0.285714	0.07	28
	3			0.38	0.25	0.375	0	24
	1	PKC-3(K282A) line 1	JLF1074: pkc-3(wow85); zif-1(gk117); wowIs3; wowEx184[end-1p::BFP::PKC-3(K282A)] "line 1" from mIn1(-) mothers	0	0.81	0.06	0.13	31
	2			0	0.64	0.23	0.14	22
	3			0	0.72	0.18	0.09	11
	*Note that "filled" does not necessarily mean "wildtype." Some filled intestines showed additional defects, particularly in mutant backgrounds.
