# Supplementary material for: Apical PAR complex proteins protect against programmed epithelial assaults to create a continuous and functional intestinal lumen
Source: eLife. 2021 Jun 17;10:e64437. doi: 10.7554/eLife.64437 (PMC8245128; doi:10.7554/eLife.64437)
Supplement: Supplementary file 1. [file elife-64437-supp1.xlsx]

## Sheet: Sheet1
Edit	PAR-6::ZF::GFP (C-term)
Allele	wow31
Repair Template plasmid	pMS237
Repair Template source	JF250, Sallee et al. 2018
5' HA Fwd	ACGTTGTAAAACGACGGCCAGTCGCCGGCAacgaccacgaaattggctttcg
5' HA Rev	CATCGATGCTCCTGAGGCTCCCGATGCTCCGTCCTCTCCCgaaTCtGAATCATTTGCGTCGTGCTG
3'Fwd HA	CGTGATTACAAGGATGACGATGACAAGAGATGAaaaactcttttcagccatttttcctcg
3'Rev HA	TCACACAGGAAACAGCTATGACCATGTTATtcaaaaatgtccaaatggagcagtgg
sgRNA/Cas9 plasmid 1	pMS235
sgRNA guide sequence 1	GACGCAAATGATTCGGACAG
sgRNA/Cas9 plasmid 2	pMS236
sgRNA guide sequence 2	ACAGCACGACGCAAATGATT
Edit	PAR-6::ZF::GFP(11) (C-term)
Allele	wow119
Repair Template plasmid	pMS255
Repair Template source	pLC01, Lauren Cote
5' HA Fwd	ACGTTGTAAAACGACGGCCAGTCGCCGGCAacgaccacgaaattggctttcg
5' HA Rev	CATCGATGCTCCTGAGGCTCCCGATGCTCCGTCCTCTCCCgaaTCtGAATCATTTGCGTCGTGCTG
3'Fwd HA	CGTGATTACAAGGATGACGATGACAAGAGATGAaaaactcttttcagccatttttcctcg
3'Rev HA	TCACACAGGAAACAGCTATGACCATGTTATtcaaaaatgtccaaatggagcagtgg
sgRNA/Cas9 plasmid 1	pMS235
sgRNA guide sequence 1	GACGCAAATGATTCGGACAG
sgRNA/Cas9 plasmid 2	pMS236
sgRNA guide sequence 2	ACAGCACGACGCAAATGATT
Edit	ZF::GFP::PKC-3 (N-term)
Allele	wow85
Repair Template plasmid	pMP41
Repair Template source	JF250, Sallee et al. 2018
5' HA Fwd	ttgtaaaacgacggccagtcgccggcagtcttgttcaggccttccag
5' HA Rev	ACAAAGTCGCGTTTTGTATTCTGTCGGCATtctgaaataaaaattgaactaaaaac
3'Fwd HA	CGTGATTACAAGGATGACGATGACAAGAGATCGTCTCCGACATCATTAGAAGAGGAC
3'Rev HA	tcacacaggaaacagctatgaccatgttatTCTGGTTTTCCAACAAAAACG
sgRNA/Cas9 plasmid	pMP42
sgRNA guide sequence	TCGTCTCCGACATCATTAG
Edit	PAR-3::GFP (internal)
Allele	wow120
Repair Template plasmid	pVN36
Repair Template source	pDD282, Addgene
5' HA Fwd	acgttgtaaaacgacggccagtcgccggcaTGTCAACCATCAGGCTCACC
5' HA Rev	TCCAGTGAACAATTCTTCTCCTTTACTGAAAGTGACAAGCGACGTTCC
3'Fwd HA	CGTGATTACAAGGATGACGATGACAAGAGACCACCGATTCCAGAAAAATCA
3'Rev HA	tcacacaggaaacagctatgaccatgttatAGTTTCACGTCCGGTCACAG
sgRNA/Cas9 plasmid	pMP15
sgRNA guide sequence	TGATTTTTCTGGAATCGGT
Edit	PAR-3::tagRFP (internal)
Allele	wow121
Repair Template plasmid	pVN39
Repair Template source	pDD286, Addgene
5' HA Fwd	cacgacgttgtaaaacgacggccagtcgTGTCAACCATCAGGCTCACC
5' HA Rev	CTTGATGAGCTCCTCTCCCTTGGAGACGAAAGTGACAAGCGACGTTCC
3'Fwd HA	GAGCAGAAGTTGATCAGCGAGGAAGACTTGCCACCGATTCCAGAAAAATCA
3'Rev HA	tcacacaggaaacagctatgaccatgttatAGTTTCACGTCCGGTCACAG
sgRNA/Cas9 plasmid	pMP15
sgRNA guide sequence	TGATTTTTCTGGAATCGGT
Edit	PAR-6::tagRFP (C-term)
Allele	wow159
Repair Template plasmid	pVN37
Repair Template source	pDD286, Addgene
5' HA Fwd	cacgacgttgtaaaacgacggccagtcgAAATGTCCGCCAACCTAGTC
5' HA Rev	CATCGATGCTCCTGAGGCTCCCGATGCTCCGTCCTCTCCACTGTCCGAAT
3'Fwd HA	GAGCAGAAGTTGATCAGCGAGGAAGACTTGTGAaaaactcttttcagccattt
3'Rev HA	ggaaacagctatgaccatgttatCGATTTCAGCCTTAAATCGTCAAGAACTCA
sgRNA/Cas9 plasmid 1	pMS235
sgRNA guide sequence 1	GACGCAAATGATTCGGACAG
sgRNA/Cas9 plasmid 2	pMS236
sgRNA guide sequence 2	ACAGCACGACGCAAATGATT
