# Supplementary figures and images for: Apical PAR complex proteins protect against programmed epithelial assaults to create a continuous and functional intestinal lumen
Source: eLife journal article supplement (doi:10.7554/elife.64437), 2021-06-17

**Figure 2 - figure supplement 1**

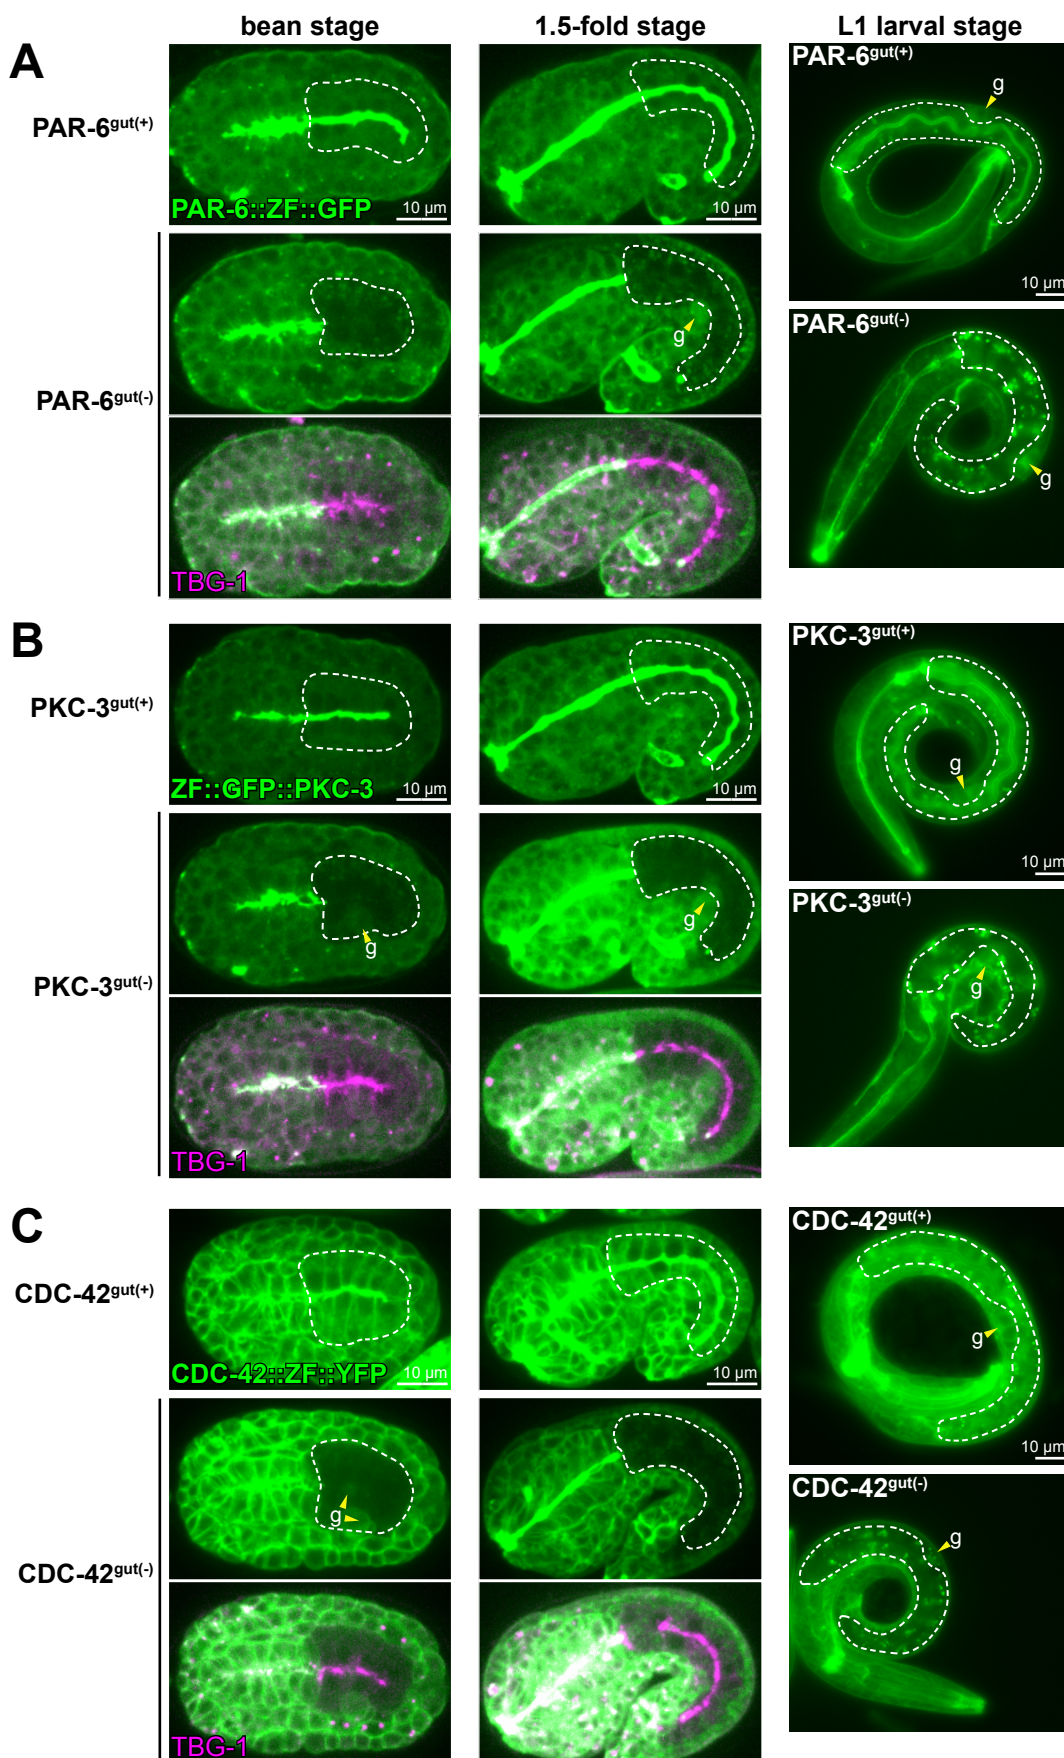

Supplement: supp [file elife-64437-supp-v1.zip]

Figure 6 - figure supplement 1

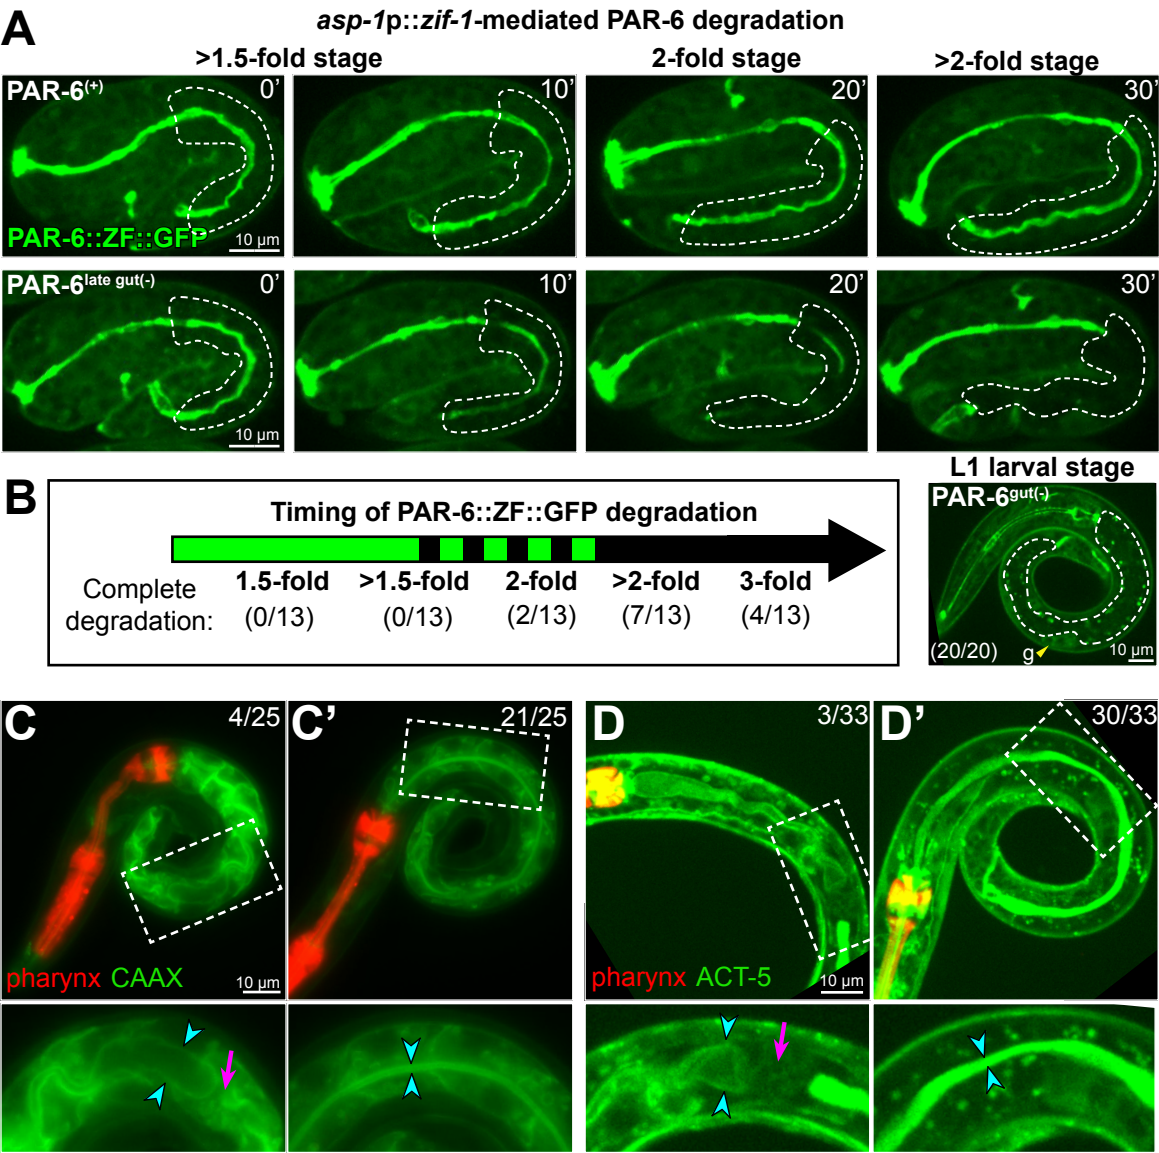

Supplement: supp [file elife-64437-supp-v1.zip]

**Figure 1 - figure supplement 2**

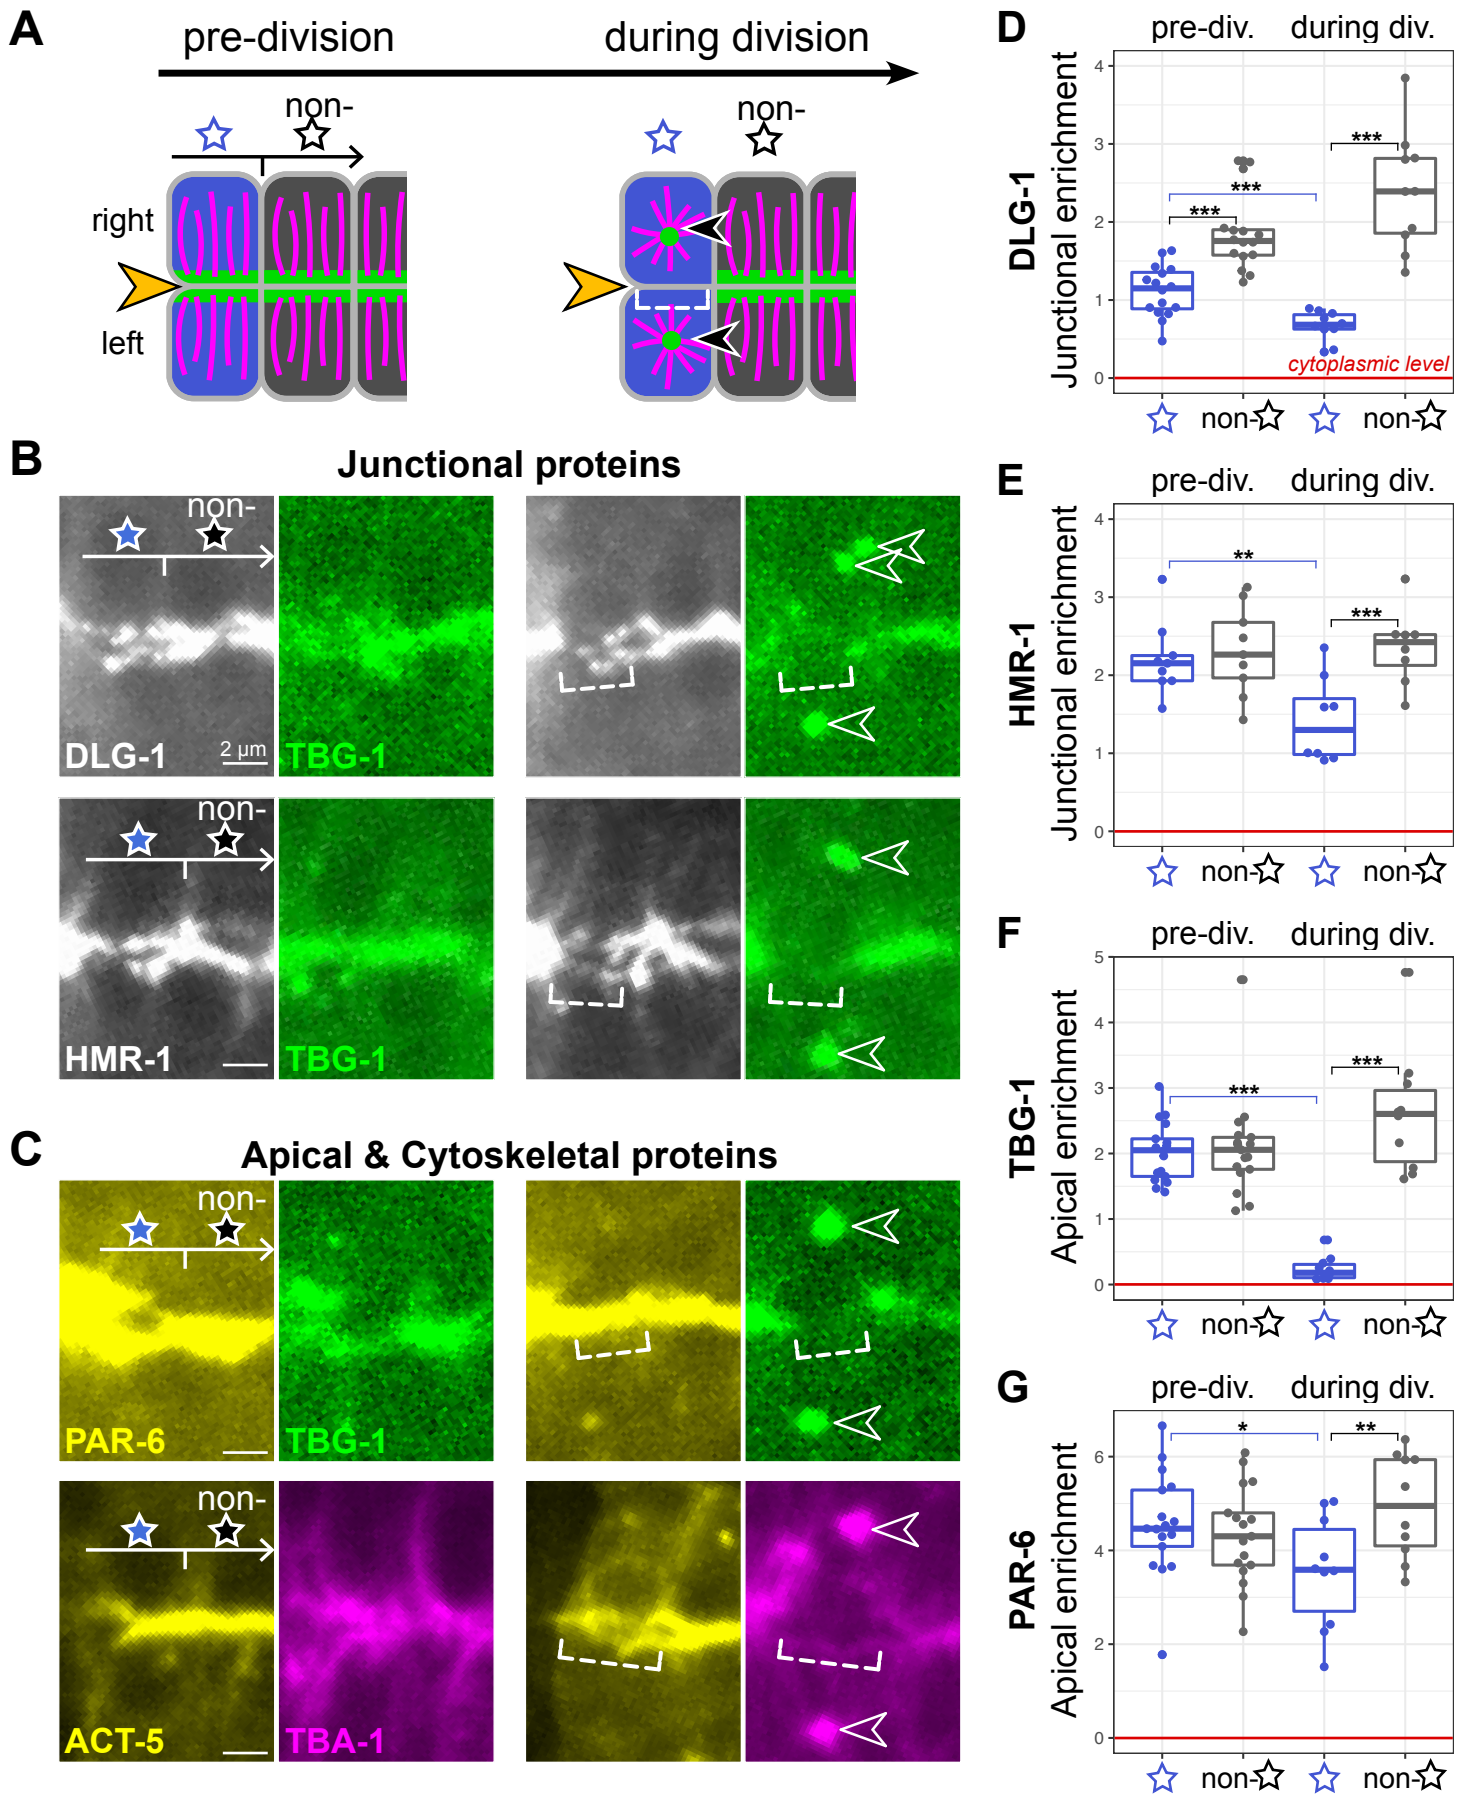

Supplement: supp [file elife-64437-supp-v1.zip]

Figure 2 - figure supplement 2

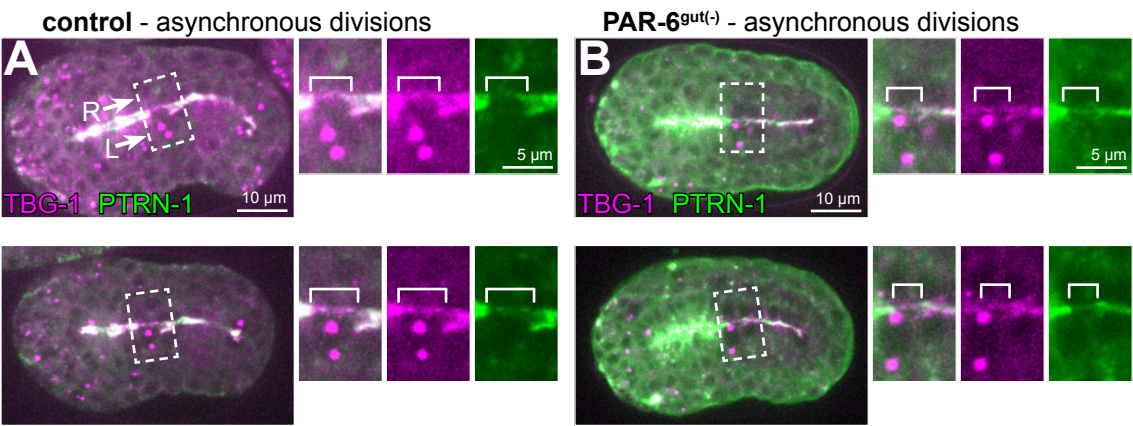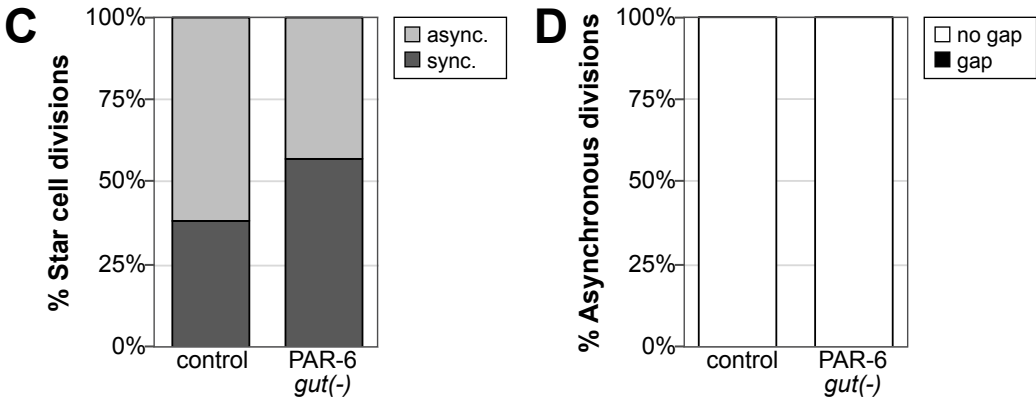

Supplement: supp [file elife-64437-supp-v1.zip]

# Figure 1 - figure supplement 1

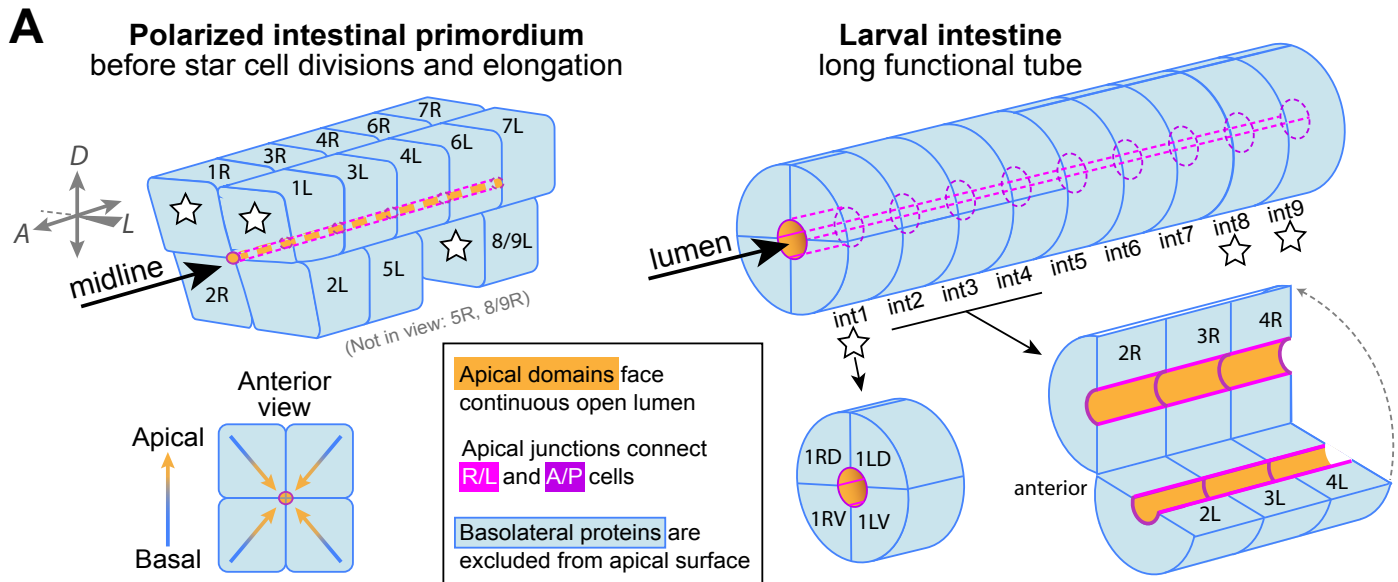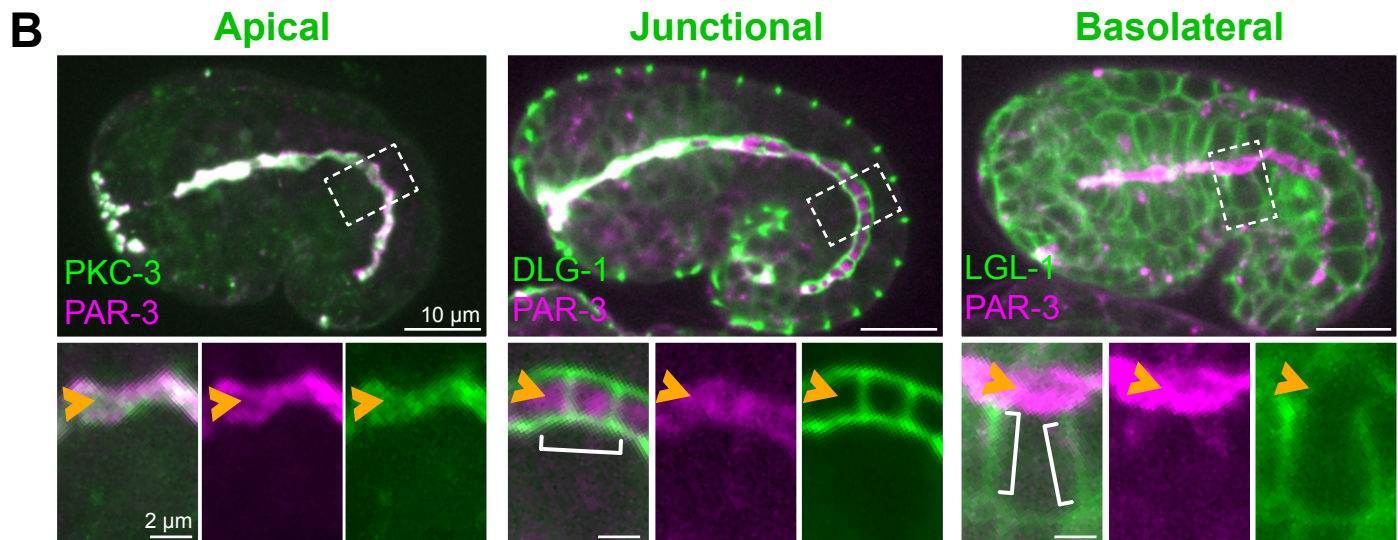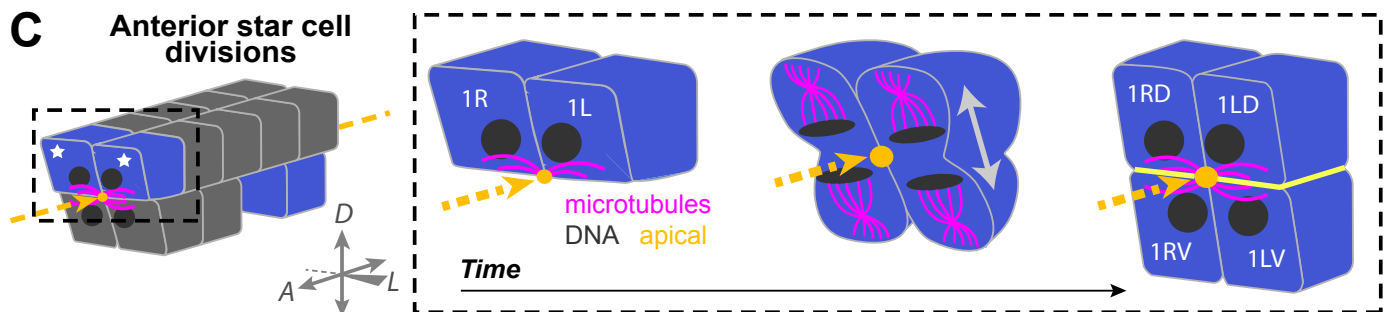

Supplement: supp [file elife-64437-supp-v1.zip]

Figure 7 - figure supplement 1

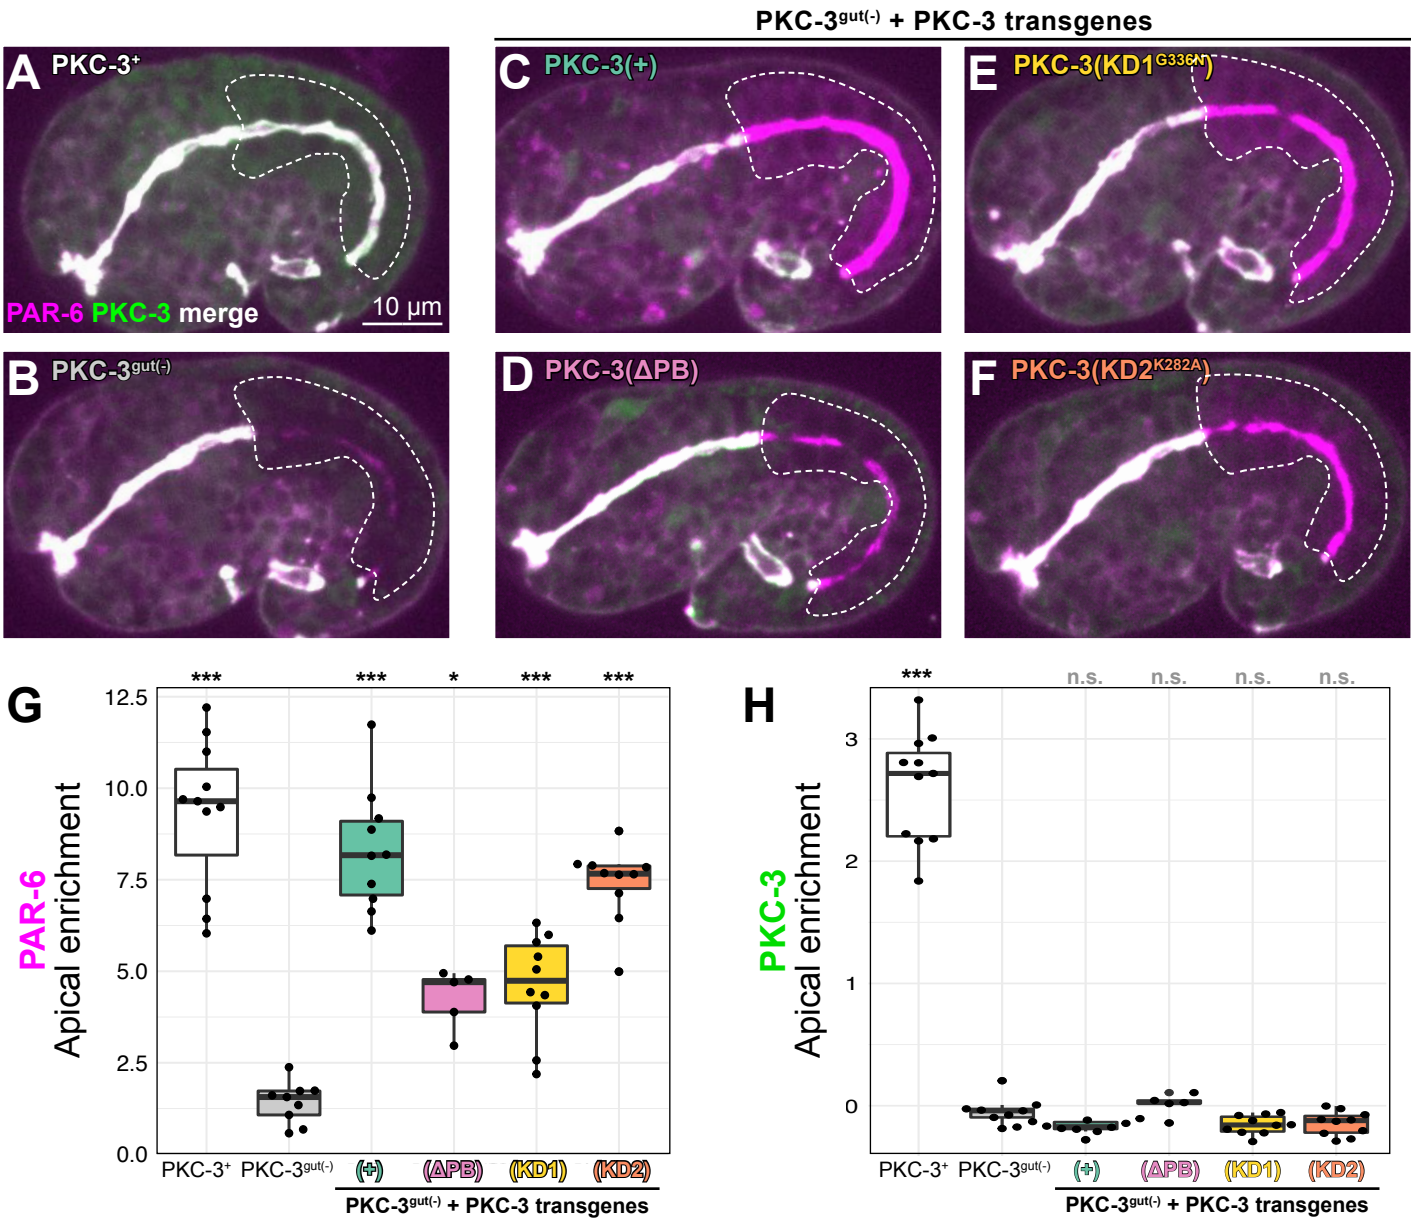

Supplement: supp [file elife-64437-supp-v1.zip]
